# Supplementary material
Source: PubMed Central journal article supplement (PMC3466063)
Supplement: supp_12-9797_iovs-12-9797-s01.pdf [file supp_12-9797_iovs-12-9797-s01.pdf]

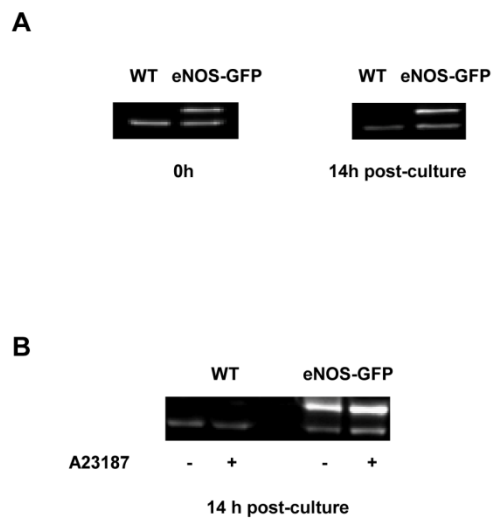

**Figure S1: eNOS expression in retinal explants before and after Ca ionophore stimulation.** **A** Freshly isolated retinas were incubated in the presence or absence of Ca ionophore and nitrite accumulation measured by Griess assay. **A** Representative western blot showing eNOS protein expression at 0h and 14 h post-ionophore stimulation. **B** Western blot showing eNOS expression after 14h with and without ionophore. There was no adverse effect on eNOS expression following culture.

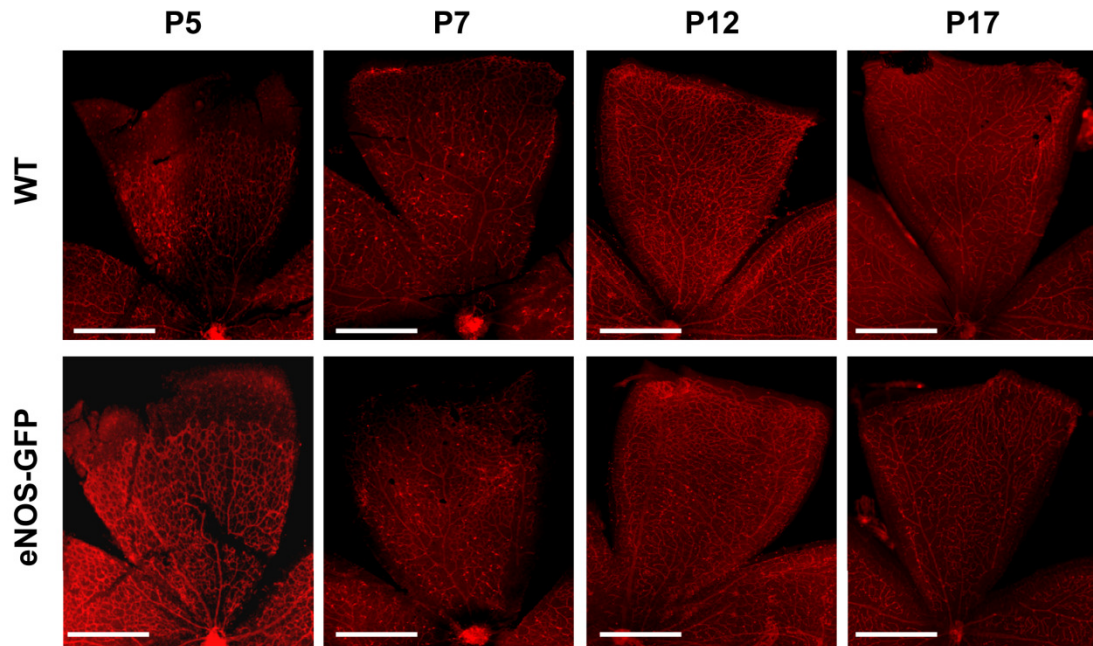

**Figure S2: Development of the inner retinal vasculature of WT and eNOS-GFP animals at P5, P7, P12 and P17.** Representative images from retinal flat mounts of WT and eNOS-GFP mice stained with lectin to show the vasculature. Retinal vascular development appears comparable throughout. Scale bars are 1 mm.

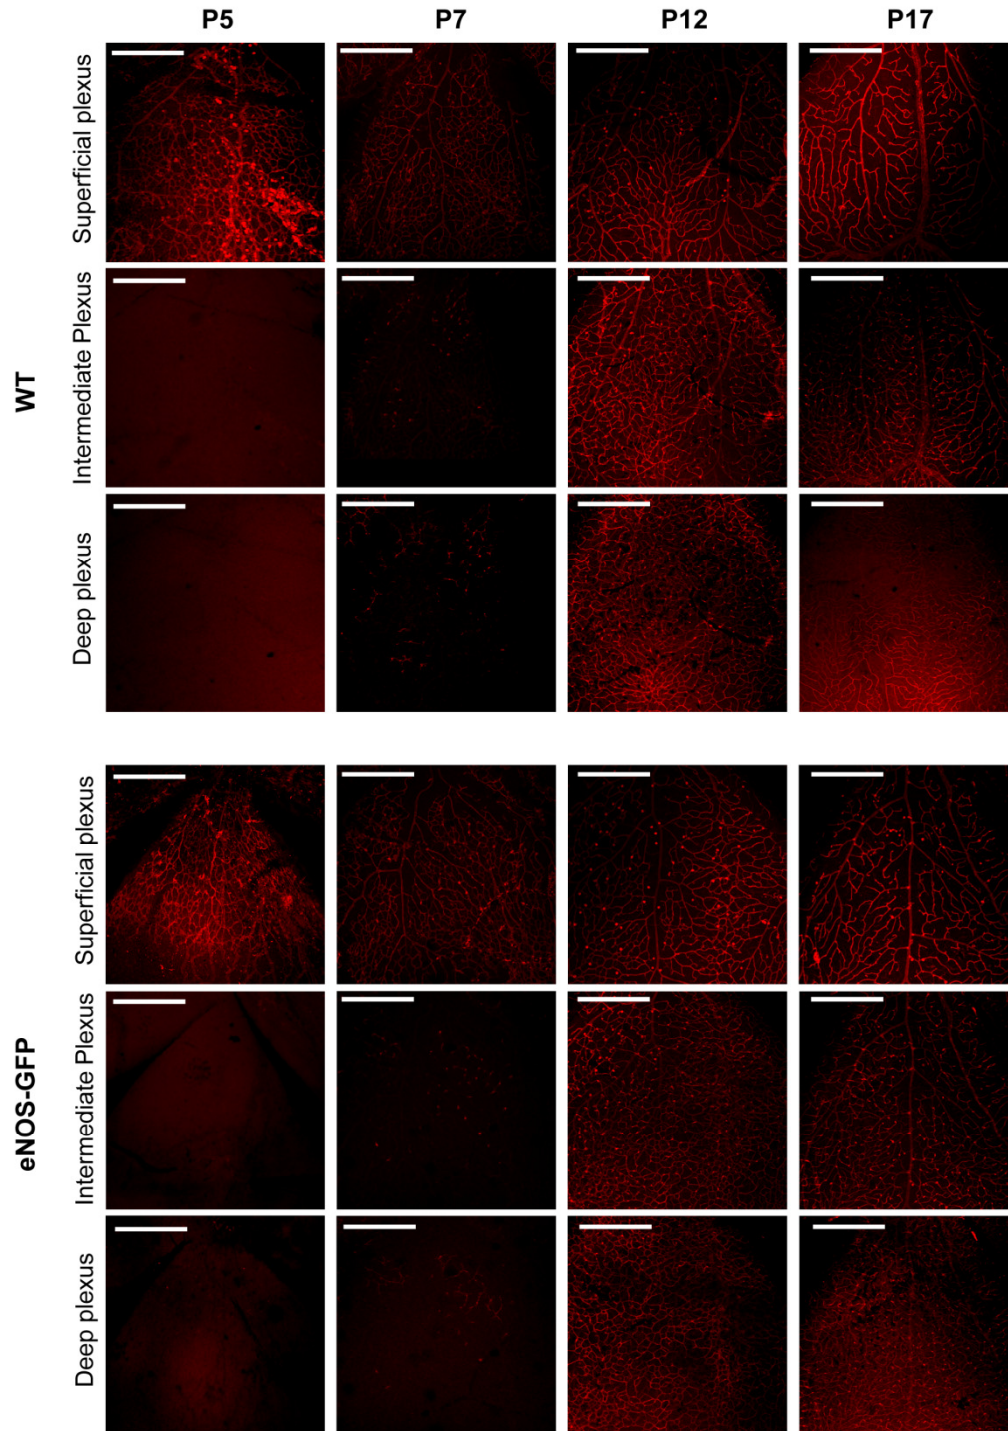

**Figure S3: Visualisation of the deeper retinal layers.** Representative images from retinal flat mounts of WT and eNOS-GFP mice stained with lectin and imaged using a confocal microscope to show the development of the superficial and deeper retinal plexi. As before, generation of these retinal beds appears similar between genotypes. Scale bars are 500 μm.

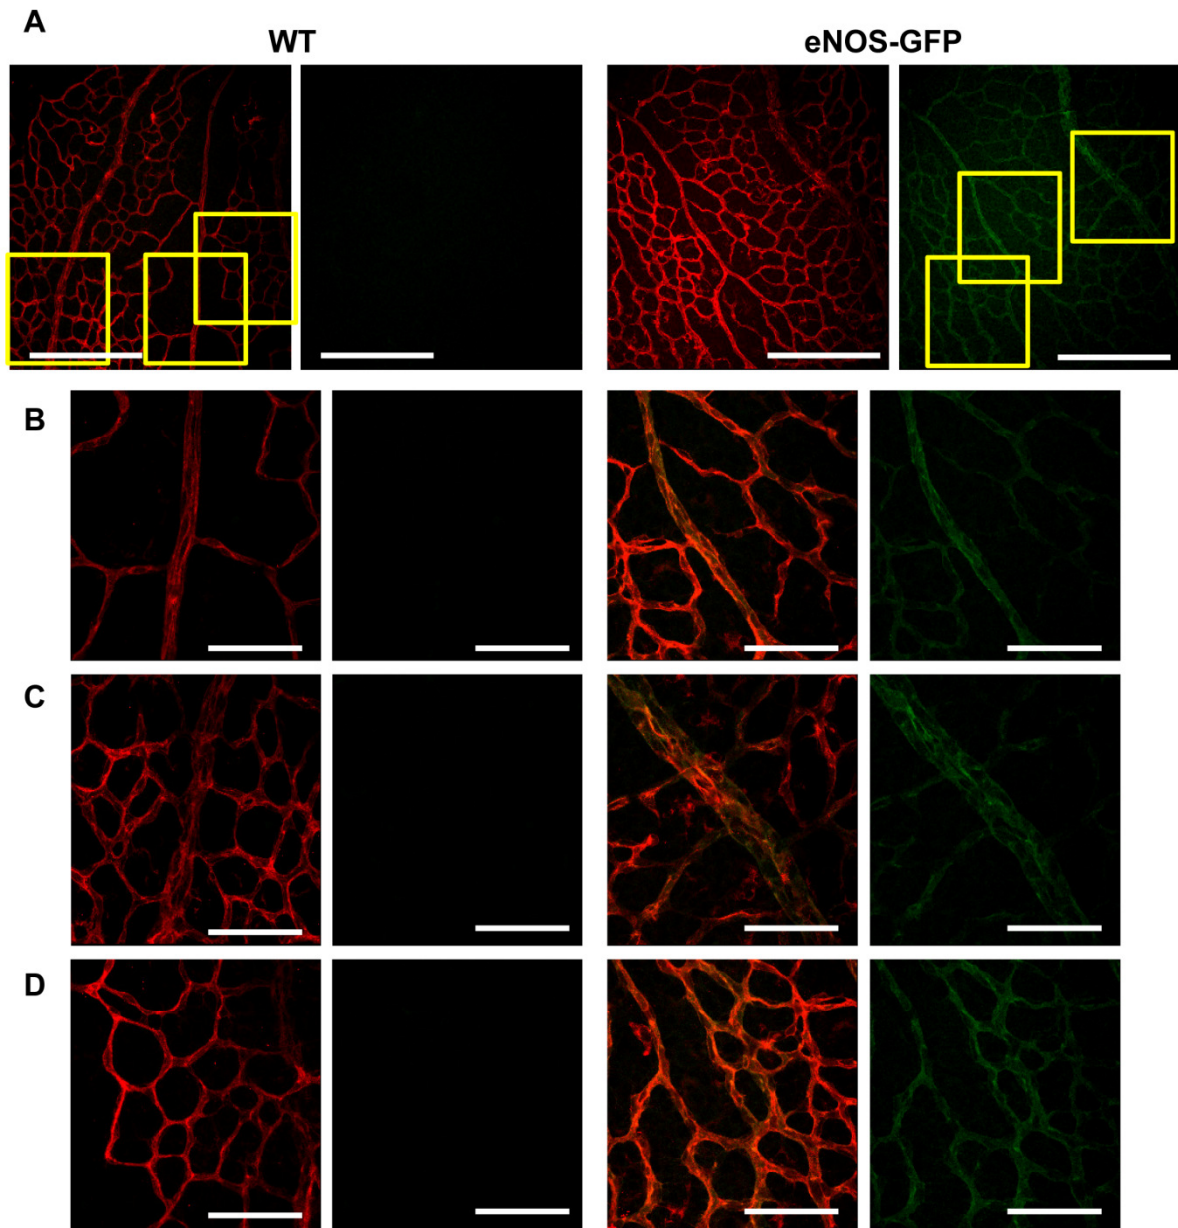

**Figure S4: eNOS-GFP expression is clearly visible in the developing vasculature at P7. A** Representative images of developing vessels in WT and eNOS-GFP retinal flat mounts stained with lectin. **B** High magnification images of those sections highlighted in the yellow box in with examples of arterioles (B), venules (C) and capillaries (D)A. Scale bars: A = 500  $\mu$ m; B,C,D =100  $\mu$ m



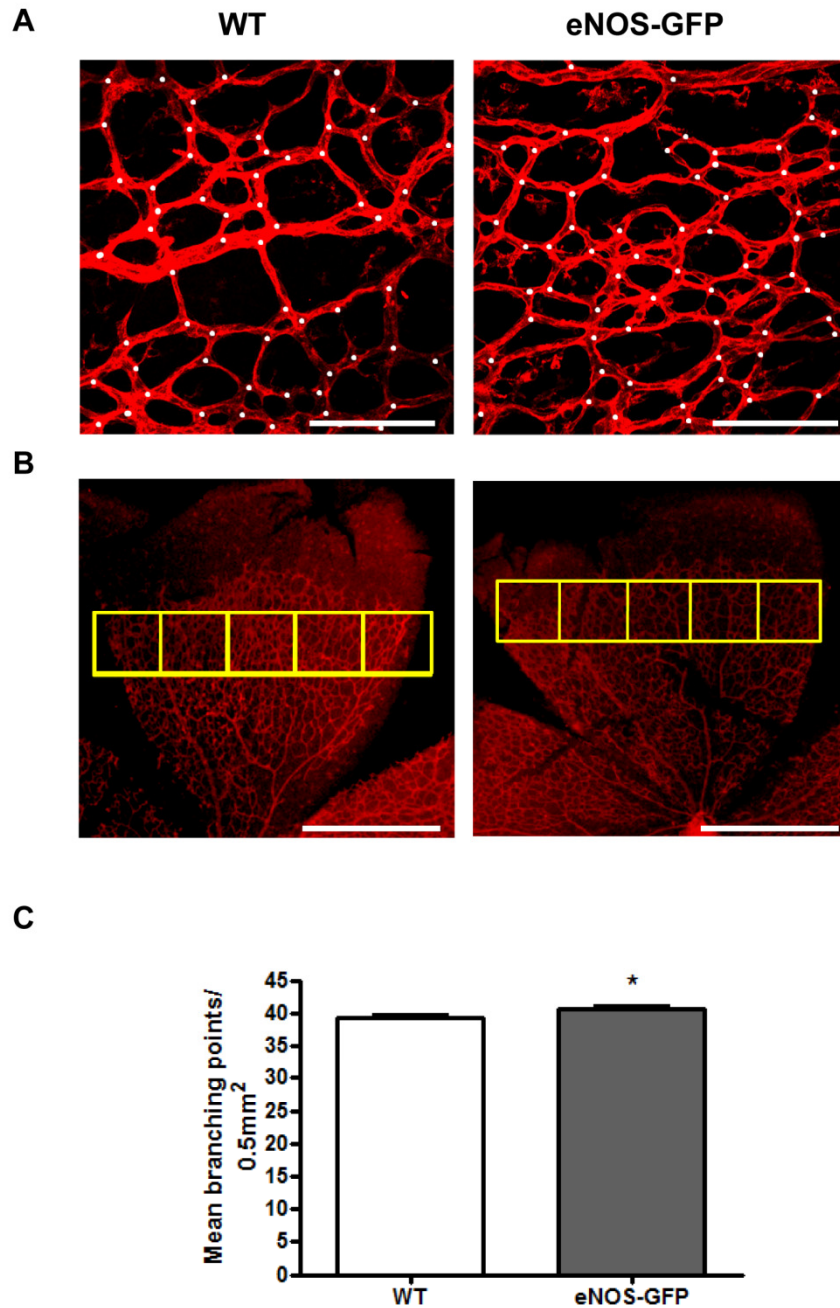

**Figure S5: Vascular branching in WT and eNOS-GFP animals at P5.** Retinal flat mounts were stained with lectin prior to imaging. **A** Representative images of branching in WT and eNOS-GFP flat mounts, branching points are marked with white dots. **B** Representative images of branching in the peripheral retina.  $n=5-8$  per group; \*  $P < 0.05$  Scale bars = 100  $\mu\text{m}$  (A), 1mm (B). **C** Quantification of retinal branching.

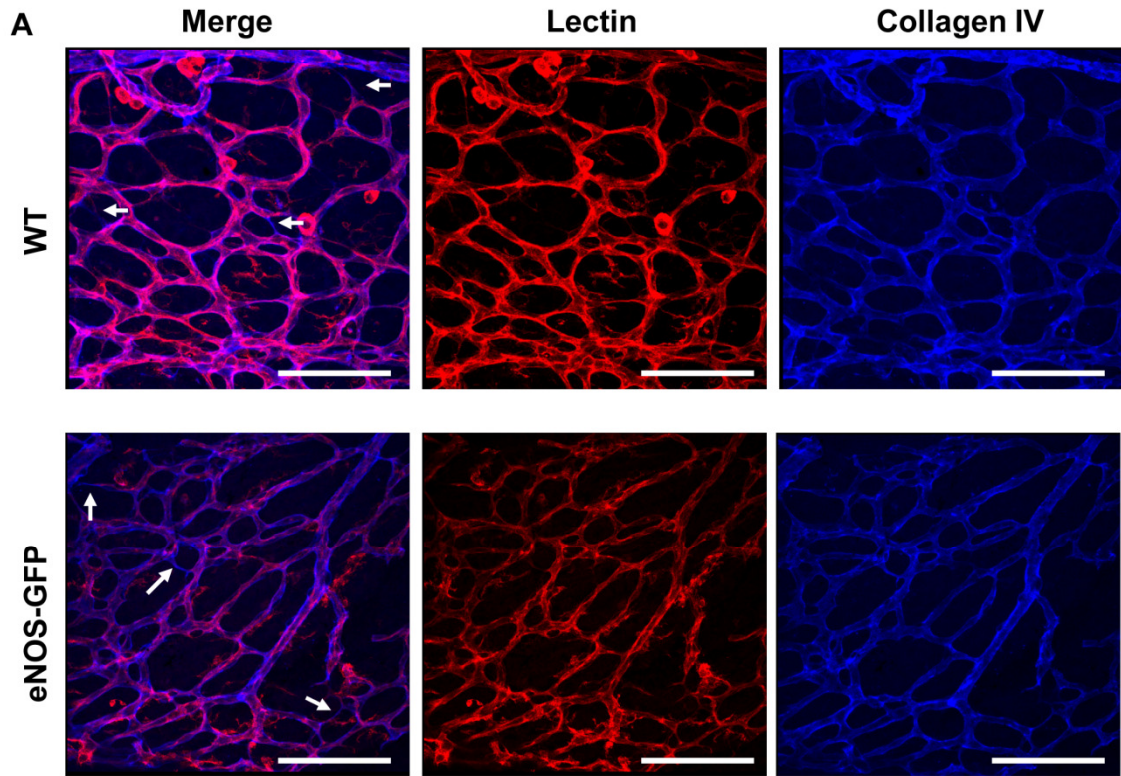

**B**

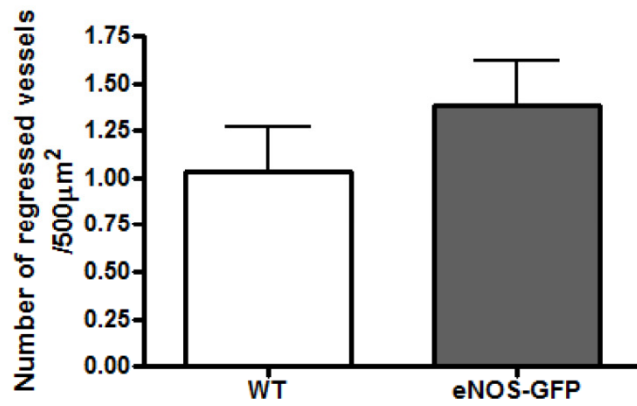

**Figure S6: Vessel regression in developing P5 retinal vasculature.** Flat mounted retinas from WT and eNOS-GFP mice were stained with lectin and collagen IV to investigate vessel remodelling. **A** Remodelled vessels were those that are collagen IV positive and lectin negative (arrows). **B** Quantification of collagen IV positive, lectin negative vessel fragments (n=5-8 per group from  $*P < 0.05$ ). There was no significant difference in the number of regressed vessel in WT and eNOS-GFP retinas. Scale bars are 100µm.

**A**

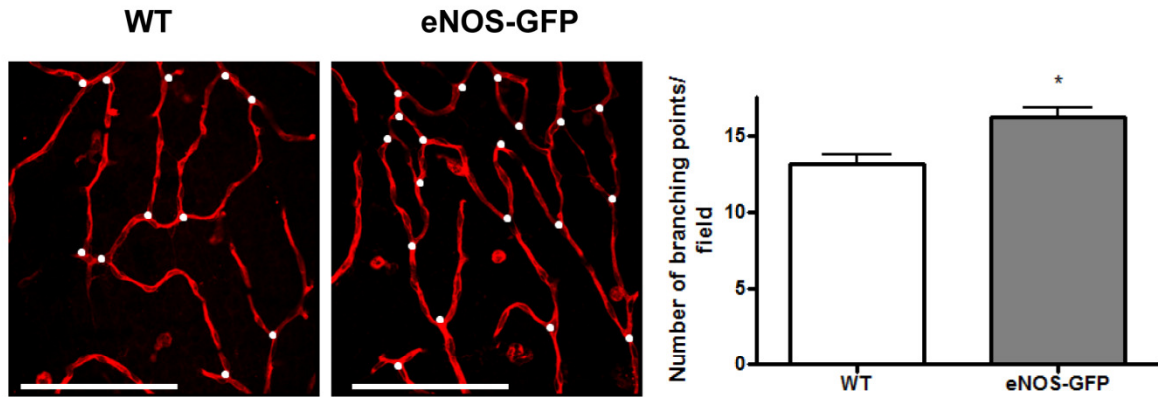

**B**

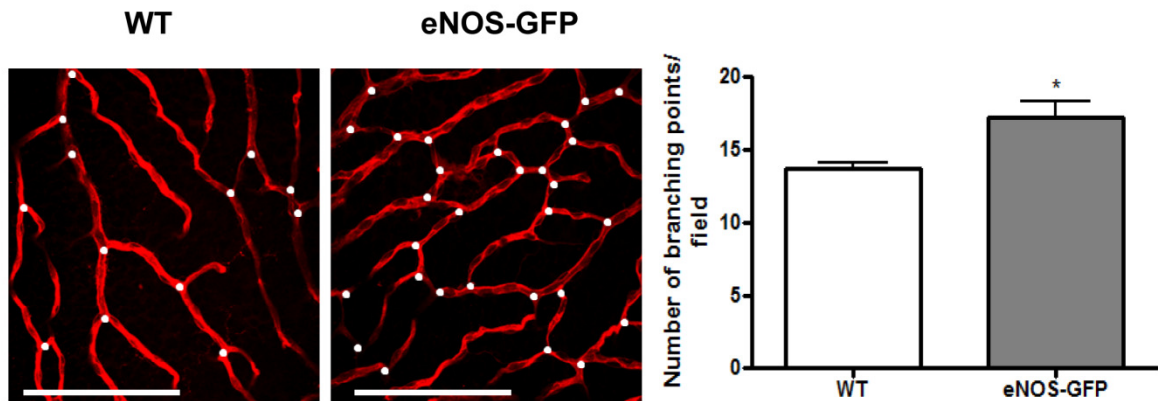

**Figure S7: Comparison of vascular branching in the central and peripheral retinal zones of WT and eNOS-GFP animals at P17.** Retinal flat mounts were stained with lectin prior to imaging. **A** Representative images of branching in WT and eNOS-GFP of the central retina in flat mounts, branching points are marked with white dots. **B** Representative images of branching in the peripheral retina (n=3 per group from \* $P < 0.05$ ). Scale bars = 100  $\mu\text{m}$ .

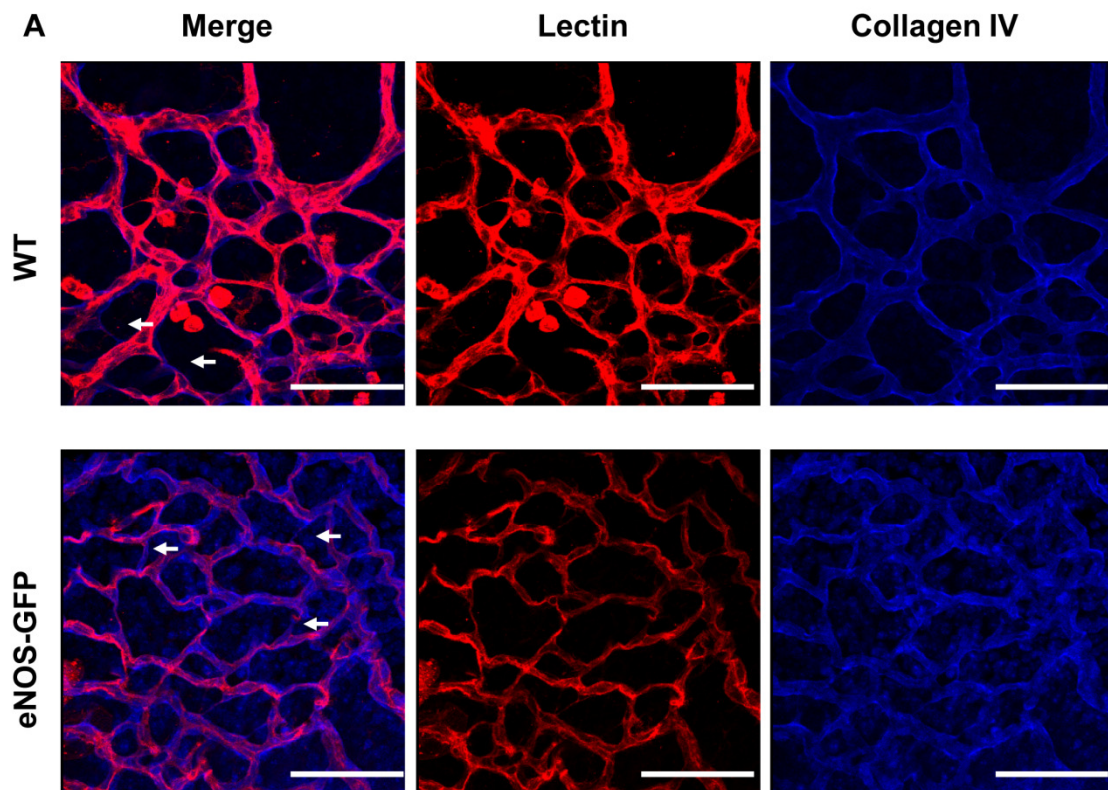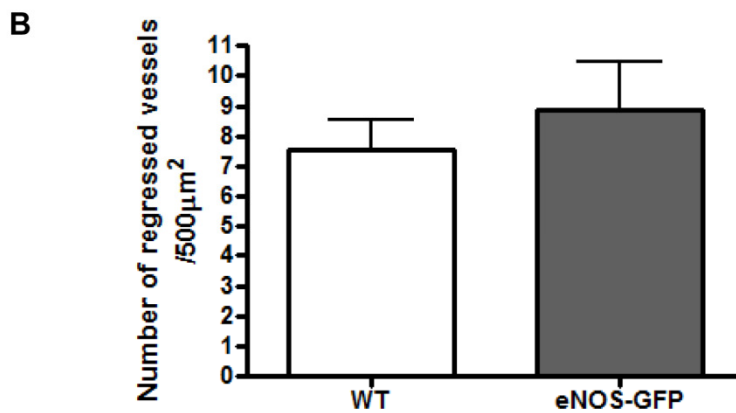

**Figure S8: Vessel regression in developing P17 retinal vasculature.** Flat mounted retinas from WT and eNOS-GFP mice were stained with lectin and collagen IV to investigate vessel remodelling. Remodelled vessels were those that are collagen IV positive and lectin negative (arrows). **B** Quantification of collagen IV positive, lectin negative vessel fragments (n=8 per group from \* $P < 0.05$ ). Scale bars are 100 μm.



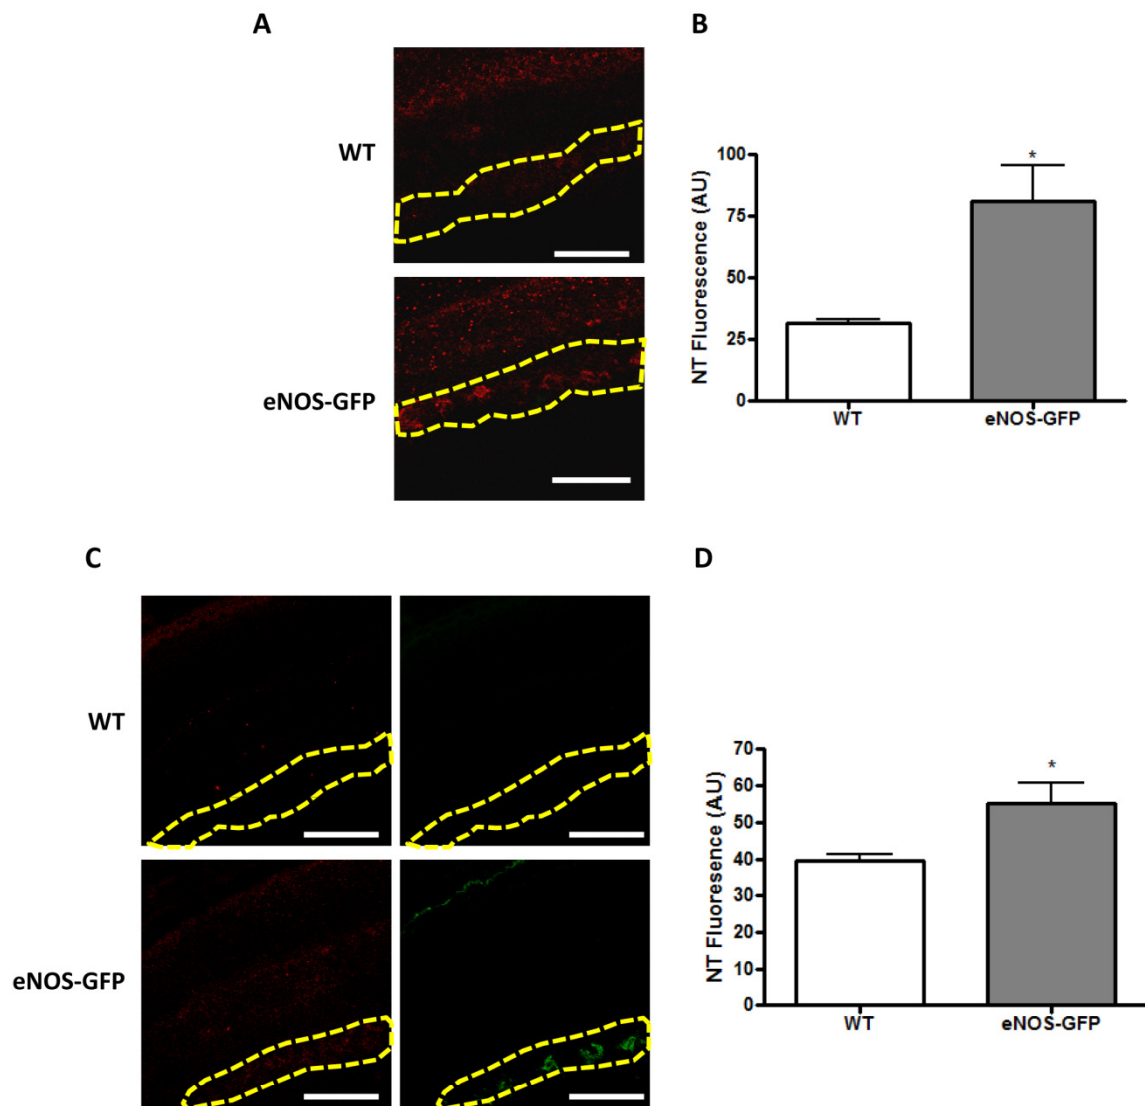

**Figure S9: Quantification of nitrotyrosine (NT) immunolabelling in the ganglion cell layer (GCL) of retinal sections at P12 post-OIR.** **A** Representative image of NT (red) staining intensity in the GCL demarcated with the yellow outline in the avascular area. **B** Quantification of NT staining shown in A. **C** Representative image of NT staining intensity in the GCL of the peripheral vasculature. **D** Quantification of NT staining shown in C, \* $P < 0.05$ ,  $n = 3$  from 3 independent OIR experiments. Scale bars are  $50\mu\text{m}$ . NT is significantly increased in GCL of retinal sections from eNOS-GFP mice compared to WT in both avascular (A & B) and vascular (C & D) regions.

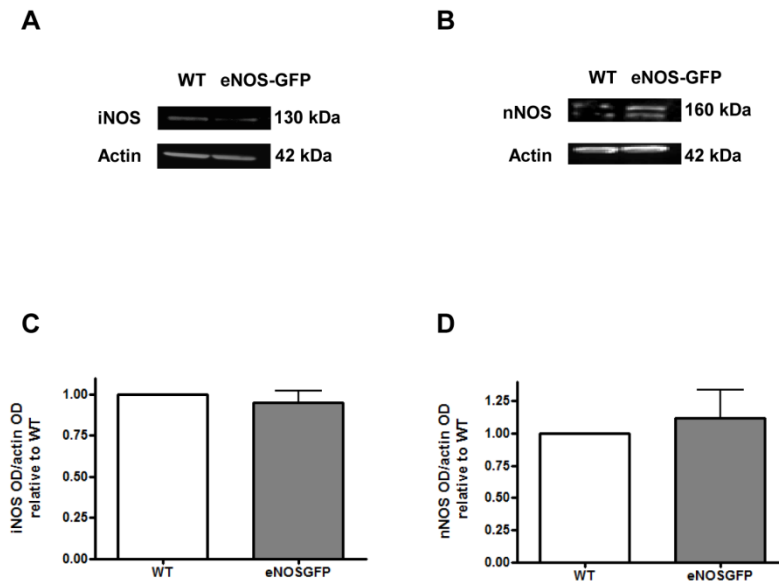

**Figure S10: iNOS and nNOS protein levels in P17 OIR eNOS-GFP retina.** Four retinas were pooled for each sample and protein was extracted for western blotting. **A** Representative western blot image for iNOS protein. **B** Representative western blot image for nNOS protein. **C** There is no significant difference in iNOS protein level, n=3 groups of 4 pooled retinas. **D** There is no significant difference in nNOS protein level, n=3 groups of 4 pooled retinas.
